# Supplementary material for: Cytokines and Chemokines in Pediatric Appendicitis: A Multiplex Analysis of Inflammatory Protein Mediators
Source: Hindawi journal article supplement (doi:10.1155/2019/2359681), 2019-02-21

**Supplementary Materials For Manuscript: Cytokines and chemokines in pediatric appendicitis: a multiplex analysis of inflammatory protein mediators.**

**Author List:** Ali Naqvi BScH<sup>1,2</sup>, Graham C Thompson MD<sup>3,4</sup>, Ari Joffe MD<sup>5</sup>, Jaime Blackwood MD<sup>3</sup>, Dori-Ann Martin BScN<sup>3</sup>, Mary Brindle MD<sup>6</sup>, Herman W. Barkema DVM, PhD<sup>2</sup>, Craig N. Jenne PhD<sup>7,8</sup>.

Supplementary tables and figures in this file include:

**Table S1.** Luminex Multiplex Assays of Inflammatory Protein Mediators

**Table S2.** Pairwise Pearson's correlation coefficient computed between cytokine concentrations of pediatric patients stratified by outcome category.

**Table S3.** Pairwise Pearson's correlation coefficient computed between cytokine concentrations of pediatric patients stratified by outcome category and severity of appendicitis.

**Table S4.** Model coefficients for the multivariate normal regression fit assessing differences between cytokine concentrations in pediatric patients (n=185) of different categories. Includes an adjustment for age and sex of patient.

**Table S5.** Model coefficients for the multivariate normal regression fit assessing differences between cytokine concentrations in pediatric patients of different categories and severity of appendicitis. Includes an adjustment for age and sex of patient.

**Table S6.** Mean and standard deviation of 54 protein mediators in children with suspected appendicitis.

**Table S7.** Test characteristics of current "gold standard" evaluations in children with suspected appendicitis.

**Figure S1.** Boxplots of 7 selected cytokine concentrations in pediatric patients grouped by category, with outliers (values > 95<sup>th</sup> percentile) included.

**Figure S2.** Boxplots of 7 selected cytokine concentrations in pediatric patients grouped by category and appendicitis severity, with outliers (values > 95<sup>th</sup> percentile) included.

**Table S1.** Luminex Multiplex Assays of Inflammatory Protein Mediators.

| <b>Assay Kits (Bio-Rad Laboratories)</b>                               | <b>Inflammatory Protein Mediators</b>                                                                                                                                                                                                                                                                                                                                                                                                                                                                                                                                                                                                                                                          |
|------------------------------------------------------------------------|------------------------------------------------------------------------------------------------------------------------------------------------------------------------------------------------------------------------------------------------------------------------------------------------------------------------------------------------------------------------------------------------------------------------------------------------------------------------------------------------------------------------------------------------------------------------------------------------------------------------------------------------------------------------------------------------|
| Bio-Plex Pro™ Human Cytokine 21-plex (#MG0005KMII)                     | Interleukin (IL)-1 $\alpha$ , IL-2R $\alpha$ , IL-3, IL-12 (p40), IL-16, IL18, cutaneous T-cell attracting chemokine (CTACK), growth related oncogene (Gro)- $\alpha$ , hepatocyte growth factor (HGF), interferon (IFN)- $\alpha$ 2, leukemia inhibitory factor (LIF), monocyte chemotactic protein (MCP)-3, monocyte colony stimulating factor (M-CSF), macrophage migration inhibitory factor (MIF), monokine induced by gamma interferon (MIG), $\beta$ -nerve growth factor (NGF), stem cell factor (SCF), stem cell growth factor (SCGF)- $\beta$ , stromal cell-derived factor (SDF)-1 $\alpha$ , tumor necrosis factor (TNF)- $\beta$ , TNF-related apoptosis-inducing ligand (TRAIL). |
| Bio-Plex Pro™ Human Cytokine 27-plex (#M500KCAF0Y)                     | Fibroblast growth factor basic (FGF2), eotaxin, granulocyte colony-stimulating factor (G-CSF), granulocyte-macrophage colony-stimulating factor (GM-CSF), IFN- $\gamma$ , IL-1 $\beta$ , IL-1ra, IL-2, IL-4, IL-5, IL-6, IL-7, IL-8, IL-9, IL-10, IL-12 (p70), IL-13, IL-15, IL-17, Interferon gamma-induced protein (IP)-10, monocyte chemotactic protein (MCP)-1 , macrophage inflammatory protein (MIP)-1 $\alpha$ and -1 $\beta$ , platelet-derived growth factor (PDGF)-BB, regulated on activation normal T-cell expressed and secreted (RANTES), tumour necrosis factor (TNF)- $\alpha$ , vascular endothelial growth factor (VEGF).                                                    |
| Bio-Plex Pro™ Human Acute Phase 5 + 4-plex Panel Complete (#171A4S07M) | Ferritin, fibrinogen, procalcitonin (PCT), serum amyloid A (SAA), tissue plasminogen activator (TPA), $\alpha$ -2-macroglobin ( $\alpha$ 2M), C-reactive protein (CRP), haptoglobin, serum amyloid P (SAP).                                                                                                                                                                                                                                                                                                                                                                                                                                                                                    |

**Table S2.** Pairwise Pearson’s correlation coefficient computed between cytokine concentrations of pediatric patients stratified by outcome category. Top-half of correlation matrix is omitted as it mirrors values in the lower half.

| Patient Category (n)            | Cytokine | IL-6   | IL-8   | IL-10  | CRP    | MCP-1  | PCT   | SAA   |
|---------------------------------|----------|--------|--------|--------|--------|--------|-------|-------|
| No appendicitis<br>(83)         | IL-6     | 1.000  |        |        |        |        |       |       |
|                                 | IL-8     | 0.373  | 1.000  |        |        |        |       |       |
|                                 | IL-10    | 0.465  | 0.434  | 1.000  |        |        |       |       |
|                                 | CRP      | 0.415  | 0.223  | 0.057  | 1.000  |        |       |       |
|                                 | MCP-1    | 0.385  | 0.334  | 0.343  | 0.165  | 1.000  |       |       |
|                                 | PCT      | 0.414  | -0.010 | 0.184  | 0.429  | 0.202  | 1.000 |       |
|                                 | SAA      | 0.407  | 0.199  | 0.129  | 0.855  | 0.164  | 0.430 | 1.000 |
| Appendicitis<br>(79)            | Cytokine | IL-6   | IL-8   | IL-10  | CRP    | MCP-1  | PCT   | SAA   |
|                                 | IL-6     | 1.000  |        |        |        |        |       |       |
|                                 | IL-8     | 0.817  | 1.000  |        |        |        |       |       |
|                                 | IL-10    | 0.590  | 0.595  | 1.000  |        |        |       |       |
|                                 | CRP      | 0.371  | 0.312  | 0.162  | 1.000  |        |       |       |
|                                 | MCP-1    | 0.746  | 0.766  | 0.459  | 0.266  | 1.000  |       |       |
|                                 | PCT      | 0.746  | 0.745  | 0.418  | 0.277  | 0.746  | 1.000 |       |
| SAA                             | -0.255   | -0.233 | -0.242 | 0.010  | -0.001 | -0.143 | 1.000 |       |
| Non-appendicitis sepsis<br>(23) | Cytokine | IL-6   | IL-8   | IL-10  | CRP    | MCP-1  | PCT   | SAA   |
|                                 | IL-6     | 1.000  |        |        |        |        |       |       |
|                                 | IL-8     | 0.703  | 1.000  |        |        |        |       |       |
|                                 | IL-10    | 0.729  | 0.603  | 1.000  |        |        |       |       |
|                                 | CRP      | -0.208 | 0.000  | -0.115 | 1.000  |        |       |       |
|                                 | MCP-1    | 0.743  | 0.810  | 0.737  | -0.022 | 1.000  |       |       |
|                                 | PCT      | 0.688  | 0.605  | 0.711  | 0.041  | 0.712  | 1.000 |       |
| SAA                             | 0.112    | 0.146  | 0.318  | -0.100 | 0.140  | 0.078  | 1.000 |       |

**Table S3.** Pairwise Pearson’s correlation coefficient computed between cytokine concentrations of pediatric patients stratified by outcome category and severity of appendicitis. Top-half of correlation matrix is omitted as it mirrors values in the lower half.

| Patient Category (n)         | Cytokine | IL-6   | IL-8   | IL-10  | CRP    | MCP-1  | PCT   | SAA   |
|------------------------------|----------|--------|--------|--------|--------|--------|-------|-------|
| No appendicitis (83)         | IL-6     | 1.000  |        |        |        |        |       |       |
|                              | IL-8     | 0.373  | 1.000  |        |        |        |       |       |
|                              | IL-10    | 0.465  | 0.434  | 1.000  |        |        |       |       |
|                              | CRP      | 0.415  | 0.223  | 0.057  | 1.000  |        |       |       |
|                              | MCP-1    | 0.385  | 0.334  | 0.343  | 0.165  | 1.000  |       |       |
|                              | PCT      | 0.414  | -0.010 | 0.184  | 0.429  | 0.202  | 1.000 |       |
|                              | SAA      | 0.407  | 0.199  | 0.129  | 0.855  | 0.164  | 0.430 | 1.000 |
| Appendicitis (48)            | Cytokine | IL-6   | IL-8   | IL-10  | CRP    | MCP-1  | PCT   | SAA   |
|                              | IL-6     | 1.000  |        |        |        |        |       |       |
|                              | IL-8     | 0.695  | 1.000  |        |        |        |       |       |
|                              | IL-10    | 0.347  | 0.338  | 1.000  |        |        |       |       |
|                              | CRP      | 0.255  | 0.406  | -0.021 | 1.000  |        |       |       |
|                              | MCP-1    | 0.598  | 0.457  | -0.019 | 0.297  | 1.000  |       |       |
|                              | PCT      | 0.482  | 0.292  | -0.122 | 0.234  | 0.594  | 1.000 |       |
| SAA                          | 0.037    | 0.133  | -0.041 | 0.255  | 0.318  | 0.288  | 1.000 |       |
| Severe appendicitis (31)     | Cytokine | IL-6   | IL-8   | IL-10  | CRP    | MCP-1  | PCT   | SAA   |
|                              | IL-6     | 1.000  |        |        |        |        |       |       |
|                              | IL-8     | 0.841  | 1.000  |        |        |        |       |       |
|                              | IL-10    | 0.702  | 0.710  | 1.000  |        |        |       |       |
|                              | CRP      | 0.187  | 0.016  | 0.042  | 1.000  |        |       |       |
|                              | MCP-1    | 0.773  | 0.821  | 0.722  | 0.014  | 1.000  |       |       |
|                              | PCT      | 0.815  | 0.826  | 0.687  | 0.036  | 0.754  | 1.000 |       |
| SAA                          | -0.370   | -0.326 | -0.346 | -0.028 | -0.067 | -0.306 | 1.000 |       |
| Non-appendicitis sepsis (23) | Cytokine | IL-6   | IL-8   | IL-10  | CRP    | MCP-1  | PCT   | SAA   |
|                              | IL-6     | 1.000  |        |        |        |        |       |       |
|                              | IL-8     | 0.703  | 1.000  |        |        |        |       |       |
|                              | IL-10    | 0.729  | 0.603  | 1.000  |        |        |       |       |
|                              | CRP      | -0.208 | 0.000  | -0.115 | 1.000  |        |       |       |
|                              | MCP-1    | 0.743  | 0.810  | 0.737  | -0.022 | 1.000  |       |       |
|                              | PCT      | 0.688  | 0.605  | 0.711  | 0.041  | 0.712  | 1.000 |       |
| SAA                          | 0.112    | 0.146  | 0.318  | -0.100 | 0.140  | 0.078  | 1.000 |       |

**Table S4.** Model coefficients for the multivariate normal regression fit assessing differences between cytokine concentrations in pediatric patients of different categories. Includes an adjustment for age and sex of patient.

| Cytokine | Coefficient             | Estimate | Standard Error | P-value |
|----------|-------------------------|----------|----------------|---------|
| IL-6     | Intercept <sup>†</sup>  | 2.720    | 0.207          | < 0.001 |
|          | Appendicitis            | 1.673    | 0.256          | < 0.001 |
|          | Non-appendicitis sepsis | 3.363    | 0.385          | < 0.001 |
|          | Age                     | -0.065   | 0.033          | 0.050   |
|          | Sex                     | 0.137    | 0.240          | 0.569   |
| IL-8     | Intercept <sup>†</sup>  | 2.965    | 0.153          | < 0.001 |
|          | Appendicitis            | 0.321    | 0.188          | 0.091   |
|          | Non-appendicitis sepsis | 1.451    | 0.284          | < 0.001 |
|          | Age                     | -0.033   | 0.024          | 0.172   |
|          | Sex                     | 0.055    | 0.177          | 0.758   |
| IL-10    | Intercept <sup>†</sup>  | 2.611    | 0.186          | < 0.001 |
|          | Appendicitis            | 0.547    | 0.230          | 0.019   |
|          | Non-appendicitis sepsis | 1.250    | 0.346          | < 0.001 |
|          | Age                     | -0.059   | 0.030          | 0.049   |
|          | Sex                     | -0.067   | 0.216          | 0.756   |
| CRP      | Intercept <sup>†</sup>  | 7.321    | 0.246          | < 0.001 |
|          | Appendicitis            | 2.851    | 0.303          | < 0.001 |
|          | Non-appendicitis sepsis | 3.555    | 0.456          | < 0.001 |
|          | Age                     | -0.115   | 0.039          | 0.004   |
|          | Sex                     | -0.243   | 0.284          | 0.394   |
| MCP-1    | Intercept <sup>†</sup>  | 4.125    | 0.137          | < 0.001 |
|          | Appendicitis            | 0.760    | 0.170          | < 0.001 |
|          | Non-appendicitis sepsis | 1.290    | 0.255          | < 0.001 |
|          | Age                     | 0.009    | 0.022          | 0.675   |
|          | Sex                     | 0.030    | 0.159          | 0.850   |
| PCT      | Intercept <sup>†</sup>  | 8.619    | 0.070          | < 0.001 |
|          | Appendicitis            | 0.383    | 0.087          | < 0.001 |
|          | Non-appendicitis sepsis | 1.326    | 0.131          | < 0.001 |
|          | Age                     | 0.002    | 0.011          | 0.860   |
|          | Sex                     | 0.107    | 0.082          | 0.190   |
| SAA      | Intercept <sup>†</sup>  | 9.048    | 0.296          | < 0.001 |
|          | Appendicitis            | 2.048    | 0.366          | < 0.001 |
|          | Non-appendicitis sepsis | 1.956    | 0.550          | < 0.001 |
|          | Age                     | -0.040   | 0.047          | 0.397   |
|          | Sex                     | 0.171    | 0.343          | 0.619   |

<sup>†</sup>Intercept refers to reference group against which the coefficients are being compared: females, of the mean age (11.16yr) with no appendicitis.

**Table S5.** Model coefficients for the multivariate normal regression fit assessing differences between cytokine concentrations in pediatric patients of different categories and severity of appendicitis. Includes an adjustment for age and sex of patient.

| Cytokine | Coefficient             | Estimate | Standard Error | P-value |
|----------|-------------------------|----------|----------------|---------|
| IL-6     | Intercept <sup>†</sup>  | 2.691    | 0.194          | < 0.001 |
|          | Appendicitis            | 0.981    | 0.281          | < 0.001 |
|          | Severe appendicitis     | 2.557    | 0.305          | < 0.001 |
|          | Non-appendicitis sepsis | 3.359    | 0.360          | < 0.001 |
|          | Age                     | -0.063   | 0.031          | 0.044   |
|          | Sex                     | 0.206    | 0.225          | 0.362   |
| IL-8     | Intercept <sup>†</sup>  | 2.945    | 0.145          | < 0.001 |
|          | Appendicitis            | -0.132   | 0.211          | 0.532   |
|          | Severe appendicitis     | 0.898    | 0.228          | < 0.001 |
|          | Non-appendicitis sepsis | 1.449    | 0.270          | < 0.001 |
|          | Age                     | -0.032   | 0.023          | 0.169   |
|          | Sex                     | 0.100    | 0.168          | 0.555   |
| IL-10    | Intercept <sup>†</sup>  | 2.591    | 0.180          | < 0.001 |
|          | Appendicitis            | 0.072    | 0.261          | 0.782   |
|          | Severe appendicitis     | 1.152    | 0.282          | < 0.001 |
|          | Non-appendicitis sepsis | 1.247    | 0.334          | < 0.001 |
|          | Age                     | -0.057   | 0.029          | 0.047   |
|          | Sex                     | -0.020   | 0.209          | 0.925   |
| CRP      | Intercept <sup>†</sup>  | 7.295    | 0.238          | < 0.001 |
|          | Appendicitis            | 2.242    | 0.344          | < 0.001 |
|          | Severe appendicitis     | 3.627    | 0.373          | < 0.001 |
|          | Non-appendicitis sepsis | 3.552    | 0.441          | < 0.001 |
|          | Age                     | -0.113   | 0.038          | 0.003   |
|          | Sex                     | -0.182   | 0.275          | 0.508   |
| MCP-1    | Intercept <sup>†</sup>  | 4.110    | 0.133          | < 0.001 |
|          | Appendicitis            | 0.413    | 0.192          | 0.033   |
|          | Severe appendicitis     | 1.203    | 0.208          | < 0.001 |
|          | Non-appendicitis sepsis | 1.288    | 0.246          | < 0.001 |
|          | Age                     | 0.010    | 0.021          | 0.626   |
|          | Sex                     | 0.065    | 0.154          | 0.675   |
| PCT      | Intercept <sup>†</sup>  | 8.611    | 0.067          | < 0.001 |
|          | Appendicitis            | 0.185    | 0.098          | 0.060   |
|          | Severe appendicitis     | 0.637    | 0.106          | < 0.001 |
|          | Non-appendicitis sepsis | 1.325    | 0.125          | < 0.001 |
|          | Age                     | 0.003    | 0.011          | 0.807   |
|          | Sex                     | 0.127    | 0.078          | 0.106   |
| SAA      | Intercept <sup>†</sup>  | 9.065    | 0.294          | < 0.001 |
|          | Appendicitis            | 2.443    | 0.427          | < 0.001 |
|          | Severe appendicitis     | 1.543    | 0.462          | 0.001   |
|          | Non-appendicitis sepsis | 1.958    | 0.547          | < 0.001 |
|          | Age                     | -0.041   | 0.047          | 0.378   |
|          | Sex                     | 0.132    | 0.341          | 0.700   |

<sup>†</sup>Intercept refers to reference group against which the coefficients are being compared: females, of the mean age (11.16yr) without appendicitis.

**Table S6.** Mean and standard deviation of 54 protein mediators in children with suspected appendicitis. All concentrations measured in pg/mL unless otherwise marked.

| Category                 | Protein         | Non-appendicitis<br>Abdominal Pain (n=84) | Appendicitis (n=50) | Perforated<br>Appendicitis (n=17) | Appendicitis-related<br>Sepsis (n=14) | Non-appendicitis<br>Sepsis (n=31) |
|--------------------------|-----------------|-------------------------------------------|---------------------|-----------------------------------|---------------------------------------|-----------------------------------|
| <b>Inflammatory</b>      | IL-1 $\beta$    | 3.06 (11.49)                              | 4.76 (11.49)        | 2.56 (1.79)                       | 7.34 (12.36)                          | 8.71 (27.24)                      |
|                          | IL-1 $\alpha$   | 28.04 (568.32)                            | 197.43 (568.32)     | 222.5 (393.41)                    | 5337.7 (14259.47)                     | 4834.78 (20025.24)                |
|                          | IL-2            | 31.03 (88.38)                             | 49.34 (88.38)       | 26.98 (33.72)                     | 43 (51.16)                            | 406.08 (1142.31)                  |
|                          | IL-4            | 91.25 (57.85)                             | 65.49 (57.85)       | 82.1 (97.58)                      | 61.74 (57.19)                         | 51.47 (96.42)                     |
|                          | IL-5            | 227.46 (297.25)                           | 262.06 (297.25)     | 296.43 (311.33)                   | 11003.57 (30278.86)                   | 5683.09 (17321.13)                |
|                          | IL-6            | 56.7 (79.56)                              | 75 (79.56)          | 54.75 (25.6)                      | 61.62 (67.69)                         | 39.48 (65.92)                     |
|                          | IL-7            | 102.96 (673.69)                           | 231.54 (673.69)     | 64.9 (56.05)                      | 156.45 (193.6)                        | 624.83 (2392.47)                  |
|                          | IL-8            | 37.94 (135.31)                            | 56.11 (135.31)      | 35.28 (45.45)                     | 59.48 (66.69)                         | 149.3 (498.36)                    |
|                          | IL-9            | 15.53 (9.84)                              | 10.73 (9.84)        | 11.59 (11.65)                     | 2.99 (4.36)                           | 1.08 (1.99)                       |
|                          | IL-10           | 224.47 (156.02)                           | 194.67 (156.02)     | 256.22 (175.56)                   | 623.3 (624.74)                        | 827.08 (1007.93)                  |
|                          | IL-12(p70)      | 1063.25 (706.37)                          | 701.92 (706.37)     | 729.83 (587.9)                    | 657.35 (1015.87)                      | 329.39 (647.94)                   |
|                          | IL-13           | 1251.38 (735.85)                          | 854.78 (735.85)     | 1038.81 (1099.58)                 | 950.69 (1426.8)                       | 1021.15 (2148.51)                 |
|                          | IL-15           | 83.92 (64.36)                             | 84.13 (64.36)       | 87.19 (39.23)                     | 193.86 (131.86)                       | 392.61 (363.08)                   |
|                          | IL-17           | 96.35 (123.9)                             | 86.57 (123.9)       | 75.86 (120.25)                    | 49.47 (77.62)                         | 209.94 (698.44)                   |
|                          | Eotaxin         | 281.31 (185.22)                           | 179.89 (185.22)     | 497.93 (857.34)                   | 478.17 (400.51)                       | 462.48 (382.13)                   |
|                          | FGF Basic       | 14.53 (8.66)                              | 6.22 (8.66)         | 7.61 (9.3)                        | 4.11 (5.98)                           | 2.14 (3.08)                       |
|                          | G-CSF           | 167.48 (57.92)                            | 80.78 (57.92)       | 61.7 (74.01)                      | 93.13 (90)                            | 113.04 (186.99)                   |
| <b>Anti-Inflammatory</b> | GM-CSF          | 336.94 (1826.48)                          | 839.12 (1826.48)    | 404.26 (481.62)                   | 1867.09 (2389.17)                     | 3001.06 (8695.13)                 |
|                          | IFN- $\gamma$   | 7.94 (3.23)                               | 2.13 (3.23)         | 1.49 (1.46)                       | 1.48 (0.91)                           | 18.16 (56.39)                     |
|                          | IP-10           | 19.91 (121.03)                            | 49.54 (121.03)      | 36.36 (36.46)                     | 314.94 (632)                          | 271.41 (864.88)                   |
|                          | MCP-1           | 5.27 (23.52)                              | 10.62 (23.52)       | 6.11 (10.2)                       | 11.61 (10.3)                          | 37.12 (123.21)                    |
| <b>Regulatory</b>        | MIP-1 $\alpha$  | 12.7 (65.61)                              | 31.24 (65.61)       | 12.58 (19.45)                     | 47.67 (102.83)                        | 94.73 (231.41)                    |
|                          | PDGF-BB         | 1.61 (8.69)                               | 3.4 (8.69)          | 1.58 (1.24)                       | 2.7 (2.08)                            | 2.92 (3.97)                       |
|                          | MIP-1 $\beta$   | 10.39 (27.34)                             | 14.56 (27.34)       | 12.24 (14.45)                     | 12.65 (12.49)                         | 54.84 (176.83)                    |
|                          | RANTES          | 29.95 (55.03)                             | 36.14 (55.03)       | 28.78 (30.53)                     | 31.49 (17.84)                         | 42.14 (52.96)                     |
|                          | TNF- $\alpha$   | 4.73 (10.88)                              | 7.05 (10.88)        | 13.19 (16.15)                     | 37.3 (56.77)                          | 29.62 (56.01)                     |
|                          | VEGF            | 68.85 (27.55)                             | 48.64 (27.55)       | 59.3 (42.84)                      | 58.73 (32.19)                         | 54.81 (47.41)                     |
|                          | IL-1 $\alpha$   | 268.51 (299.95)                           | 279.49 (299.95)     | 233.41 (224.9)                    | 111.33 (62.52)                        | 120.42 (118.88)                   |
|                          | IL-2R $\alpha$  | 52.61 (24.63)                             | 49.84 (24.63)       | 55.12 (36.56)                     | 75.87 (50.75)                         | 76.28 (114.11)                    |
|                          | IL-3            | 475.03 (224.47)                           | 411.14 (224.47)     | 450.5 (275.41)                    | 511.33 (369.03)                       | 457.29 (325.58)                   |
|                          | IL-12(p40)      | 356.97 (274.26)                           | 354.86 (274.26)     | 789.58 (743.33)                   | 1607.22 (1404.51)                     | 928.98 (664.94)                   |
|                          | IL-16           | 79.37 (69.76)                             | 71.13 (69.76)       | 57.59 (40.47)                     | 83.69 (39.06)                         | 97.06 (77.22)                     |
|                          | IL-18           | 30.49 (27.41)                             | 22.48 (27.41)       | 25.52 (28.38)                     | 30.5 (21.57)                          | 23.9 (53.24)                      |
|                          | CTACK           | 35.4 (20.02)                              | 23.73 (20.02)       | 24.8 (20.52)                      | 67.39 (70.74)                         | 124.6 (337.73)                    |
|                          | GRO $\alpha$    | 3.9 (12.21)                               | 5.52 (12.21)        | 3.33 (3.09)                       | 5.63 (5.27)                           | 5.48 (2.8)                        |
| HGF                      | 165.64 (84.54)  | 124.81 (84.54)                            | 114.5 (58.27)       | 159.4 (118.39)                    | 210.09 (181.72)                       |                                   |
| <b>Chemokine</b>         | IFN- $\alpha$ 2 | 24.37 (16.87)                             | 21.41 (16.87)       | 43.64 (48.9)                      | 770.92 (2081.97)                      | 385.83 (922.46)                   |
|                          | LIF             | 40.49 (34.11)                             | 46.5 (34.11)        | 32.01 (30.25)                     | 100.36 (94.67)                        | 116.13 (225.43)                   |
|                          | MCP-3           | 553.53 (864.12)                           | 484.35 (864.12)     | 206.67 (165.27)                   | 2891.13 (5579.93)                     | 6803.96 (23573.25)                |
|                          | M-CSF           | 88.32 (115.79)                            | 129.72 (115.79)     | 164.76 (130.98)                   | 1361.91 (2463.48)                     | 604.99 (1786.25)                  |
|                          | MIF             | 4.68 (1.75)                               | 3.98 (1.75)         | 4.29 (2.36)                       | 4.64 (1.7)                            | 4.89 (5.17)                       |

|                    |                          |                         |                         |                         |                         |                        |
|--------------------|--------------------------|-------------------------|-------------------------|-------------------------|-------------------------|------------------------|
|                    | MIG                      | 85.78 (64.83)           | 105.09 (64.83)          | 148.83 (174.25)         | 185.38 (118.52)         | 244.06 (558.94)        |
|                    | $\beta$ -NGF             | 5441.47 (3523.72)       | 5715.89 (3523.72)       | 4976.66 (3378.26)       | 3339.55 (3587.5)        | 1781.21 (1824.66)      |
|                    | SCF                      | 1058.86 (327.13)        | 904.19 (327.13)         | 977.03 (473.31)         | 1191.78 (666.65)        | 1329.83 (964.45)       |
|                    | SDF-1 $\alpha$           | 92.66 (49.2)            | 64.3 (49.2)             | 88.23 (77.32)           | 867.44 (2477.29)        | 573.5 (1616.44)        |
|                    | TNF- $\beta$             | 1958.52 (2540.74)       | 764.73 (2540.74)        | 602.98 (1251.25)        | 2299.7 (3371.95)        | 6584.13 (18715.15)     |
|                    | TRAIL                    | 321.12 (86.87)          | 272.81 (86.87)          | 329.56 (171.26)         | 256.62 (114.3)          | 260.62 (213.53)        |
| <b>Acute Phase</b> | PCT <sup>1</sup>         | 6.09 (30.60)            | 7.35 (30.60)            | 8.12 (4.03)             | 20.98 (17.00)           | 33.06 (51.93)          |
|                    | Ferritin                 | 35519.11 (30061.62)     | 52622.23 (30061.62)     | 79630.09 (63234.64)     | 547857.19 (1022728.32)  | 444619.05 (979265.21)  |
|                    | tPA                      | 4550.68 (1837.21)       | 4252.04 (1837.21)       | 4697.83 (1337.32)       | 2347.36 (1086.55)       | 3615.36 (1475.96)      |
|                    | SAA <sup>2</sup>         | 122.73 (435.79)         | 312.36 (435.79)         | 200.68 (296.19)         | 90.96 (132.13)          | 92.52 (83.47)          |
|                    | $\alpha$ 2M <sup>1</sup> | 1680543.36 (3497764.31) | 2926176.71 (3497764.31) | 1953556.09 (1621340.26) | 3034418.33 (3917537.66) | 1101392.78 (422610.36) |
|                    | CRP <sup>2</sup>         | 7.62 (21.80)            | 23.41 (21.80)           | 91.82 (65.34)           | 72.97 (62.31)           | 70.58 (44.28)          |
|                    | SAP <sup>1</sup>         | 25574.33 (16462.68)     | 26301.23 (16462.68)     | 27670.08 (12649.25)     | 24577.78 (14834.48)     | 32841.91 (13573.2)     |

<sup>1</sup>Concentrations measured in ng/mL

<sup>2</sup>Concentrations measured in mg/L



**Table S7.** Test characteristics of current “gold standard” evaluations in children with suspected appendicitis.

|                                                  | <b>Cut-off Value</b> | <b>Sensitivity</b> | <b>Specificity</b> | <b>Correctly Classified</b> |
|--------------------------------------------------|----------------------|--------------------|--------------------|-----------------------------|
| <b>WBC</b> ( $\times 10^3/\mu\text{L}$ )         | >10                  | 88.9%              | 58.4%              | 72.1%                       |
|                                                  | >12                  | 81.0%              | 71.4%              | 75.7%                       |
|                                                  | >15                  | 61.9%              | 80.5%              | 72.1%                       |
| <b>Neutrophils</b> ( $\times 10^3/\mu\text{L}$ ) | >8                   | 85.7%              | 74.3%              | 78.6%                       |
|                                                  | >10                  | 78.6%              | 80.0%              | 79.5%                       |
| <b>PAS</b>                                       | $\geq 7$             | 73.5%              | 71.7%              | 72.3%                       |

WBC – white blood cell count; PAS – pediatric appendicitis score.

**Figure S1.** Boxplots of 7 selected cytokine concentrations in pediatric patients (n=196) grouped by category, with outliers (values > 95<sup>th</sup> percentile) included.

<sup>1</sup> Concentrations are in ng/mL for PCT; mg/L for CRP, and SAA; pg/mL for IL-6, IL-8, IL-10, and MCP-1

\* *P*-value < 0.05; \*\* *P*-value < 0.01; \*\*\* *P*-value < 0.001

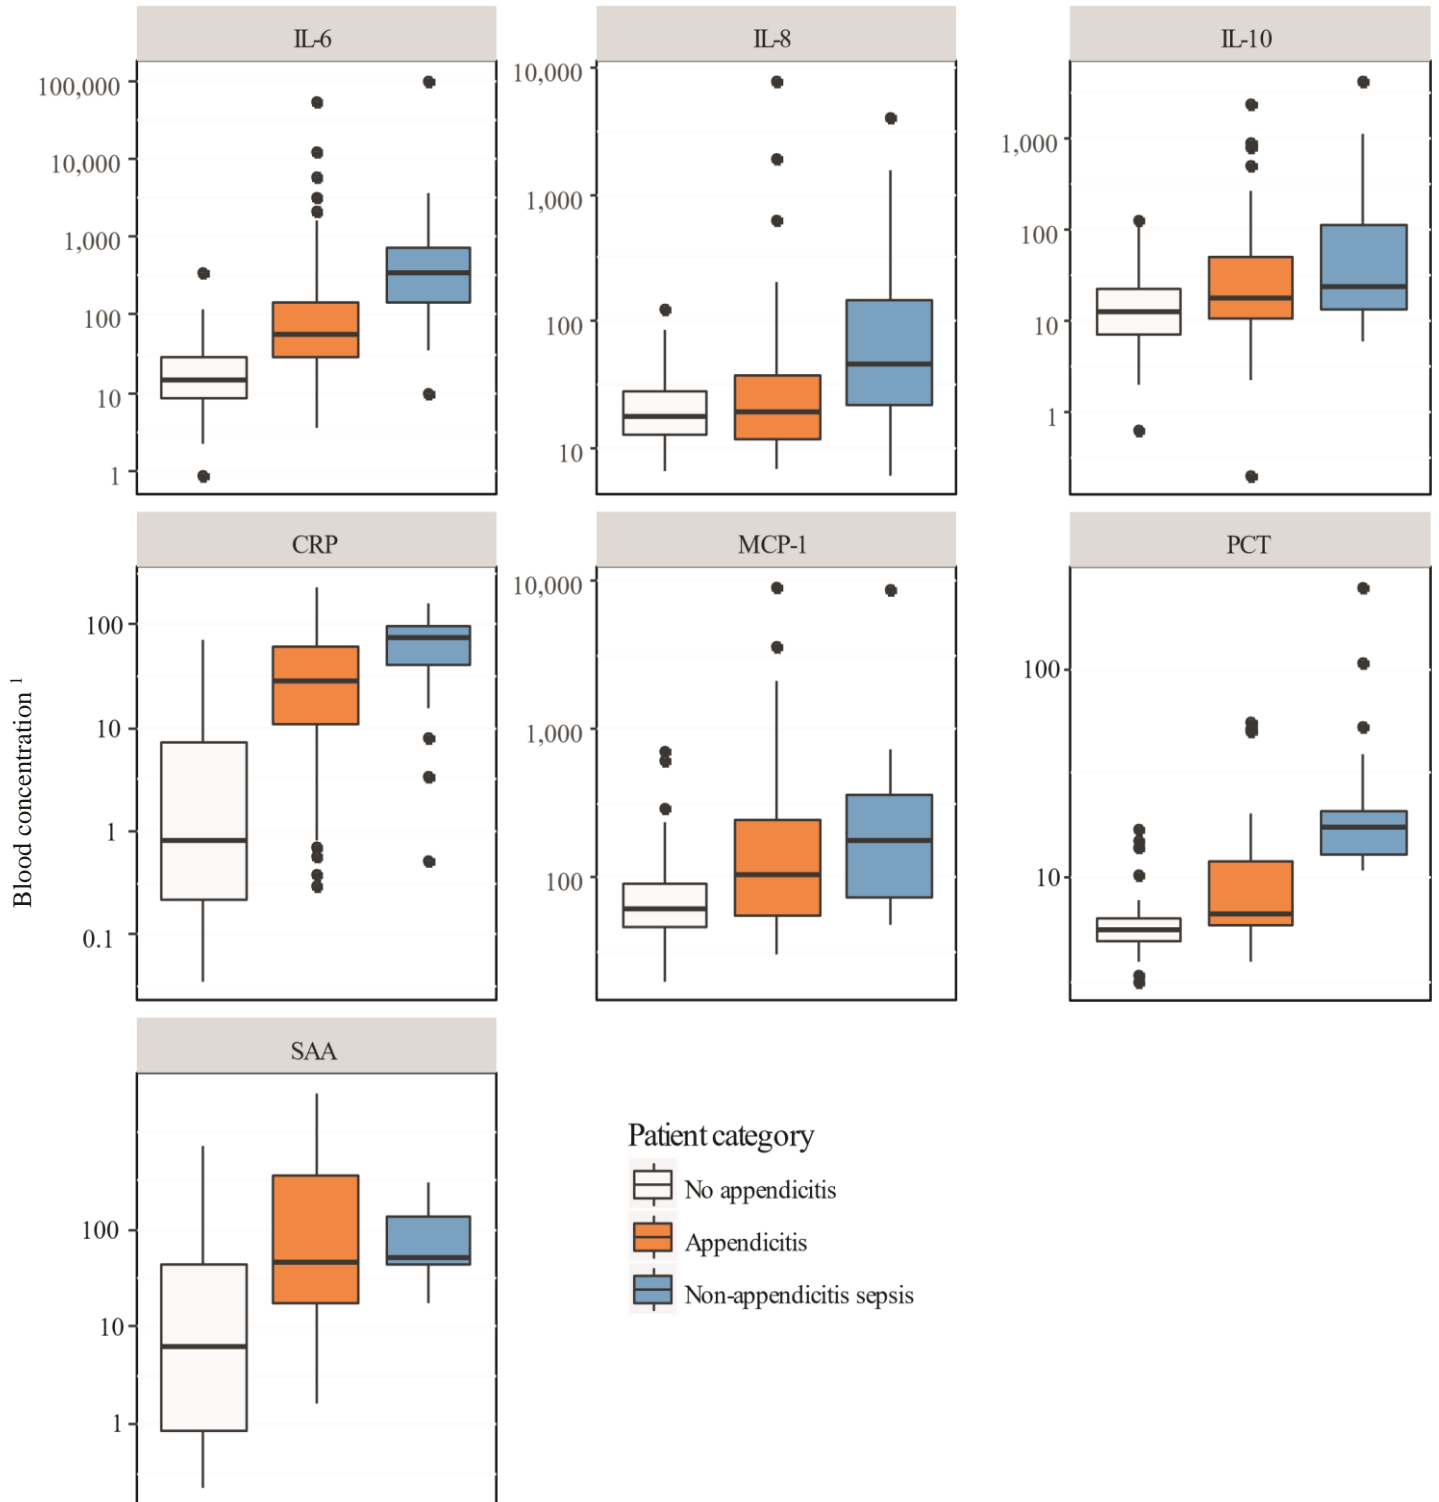

**Figure S2.** Boxplots of 7 selected cytokine concentrations in pediatric patients (n=196) grouped by category and appendicitis severity, with outliers (values > 95<sup>th</sup> percentile) included.

<sup>1</sup> Concentrations are in ng/mL for PCT; mg/L for CRP, and SAA; pg/mL for IL-6, IL-8, IL-10, and MCP-1

\* *P*-value < 0.05; \*\* *P*-value < 0.01; \*\*\* *P*-value < 0.001

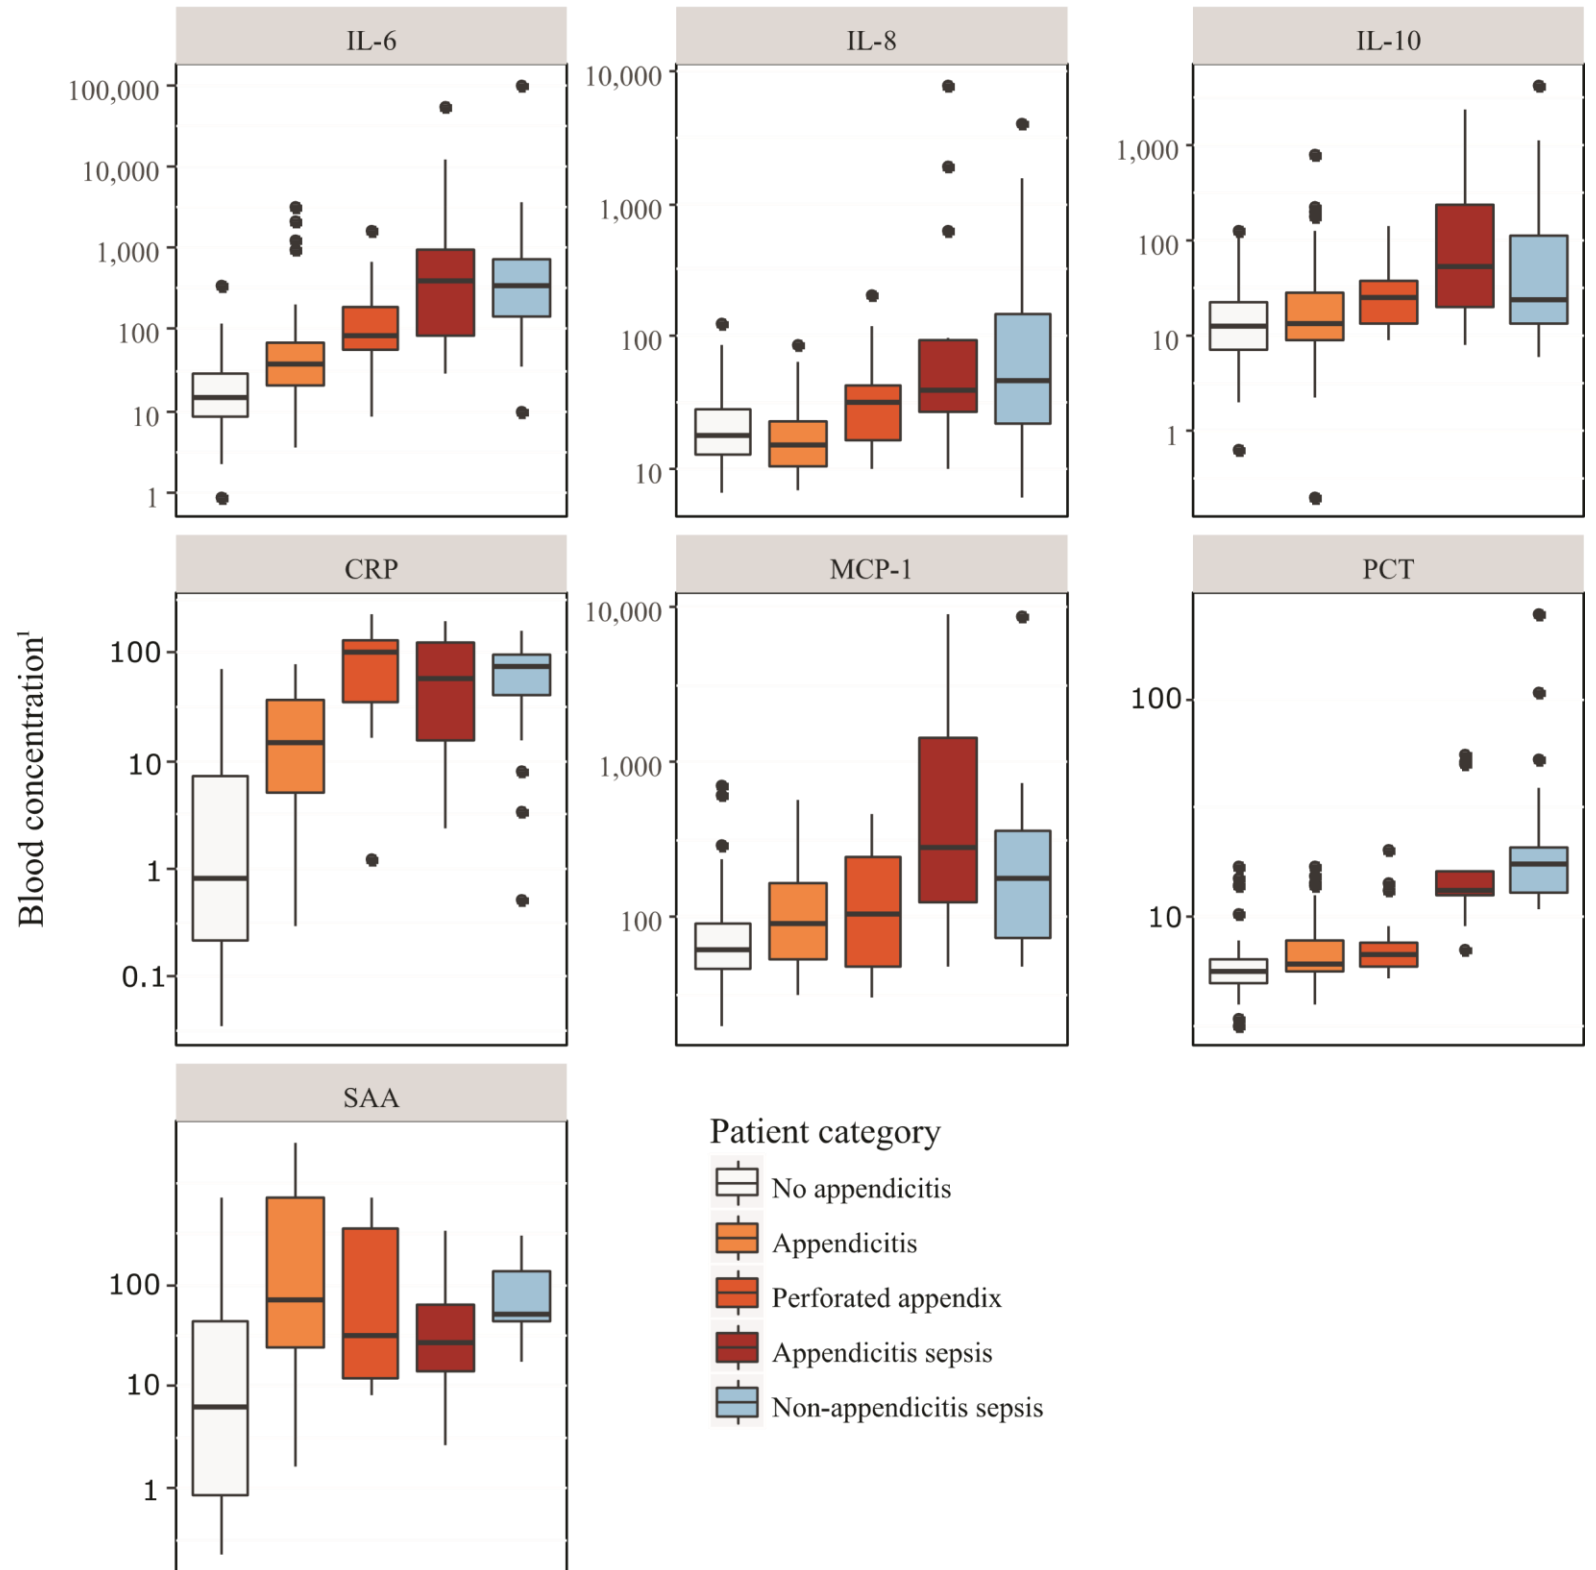

Supplement: f1 [file 2359681.f1.pdf]
